# Supplementary material for: Antibacterial and Antibiofilm Activities of β-Lapachone by Modulating the Catalase Enzyme
Source: Antibiotics (Basel). 2023 Mar 14;12(3):576. doi: 10.3390/antibiotics12030576 (PMC10044350; doi:10.3390/antibiotics12030576)
Supplement: Supplementary file 1 [file antibiotics-12-00576-s001.zip › antibiotics-2216972-supplementary.pdf]

### Supplementary data

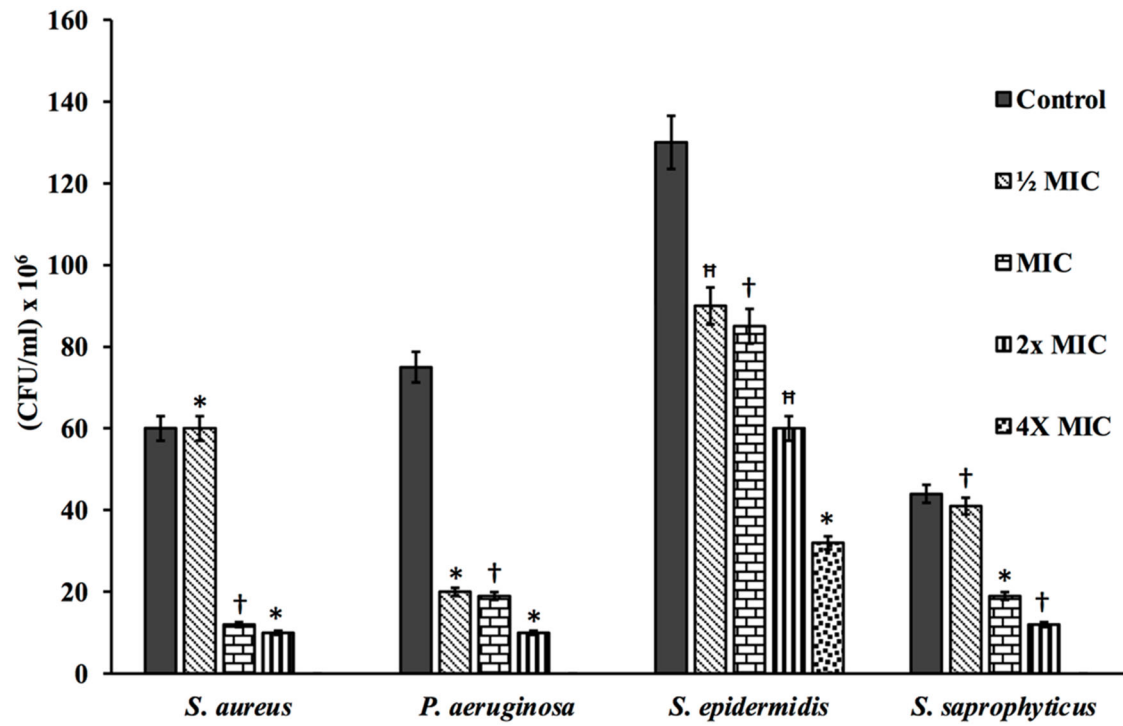

### Supplementary Figure S1. CFUs of bacterial strains at different concentrations of $\beta$ –Lap:

The CFUs for each bacterial strains treated with 1/2MIC, MIC, 2xMIC and 4xMIC of  $\beta$  –Lap for 24 hours were enumerated and plotted. The cfu plotted are the average of three technical replicates. \*,  $p < 0.002$ , †;  $p < 0.004$ , ‡;  $p < 0.007$ .

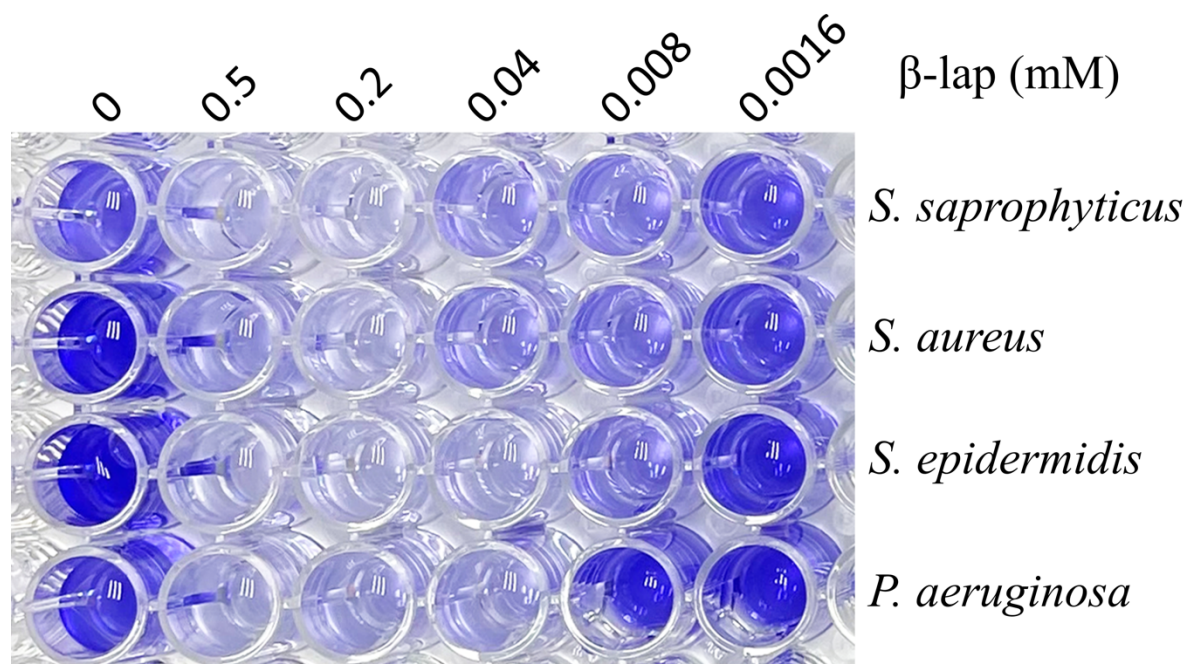

**Supplementary Figure S2:  $\beta$  -Lap inhibited the biofilm formation.** Image of biofilms formed by *S. saprophyticus*, *S. aureus*, *S. epidermidis*, and *P. aeruginosa* in presence of different concentrations of  $\beta$  -Lap .

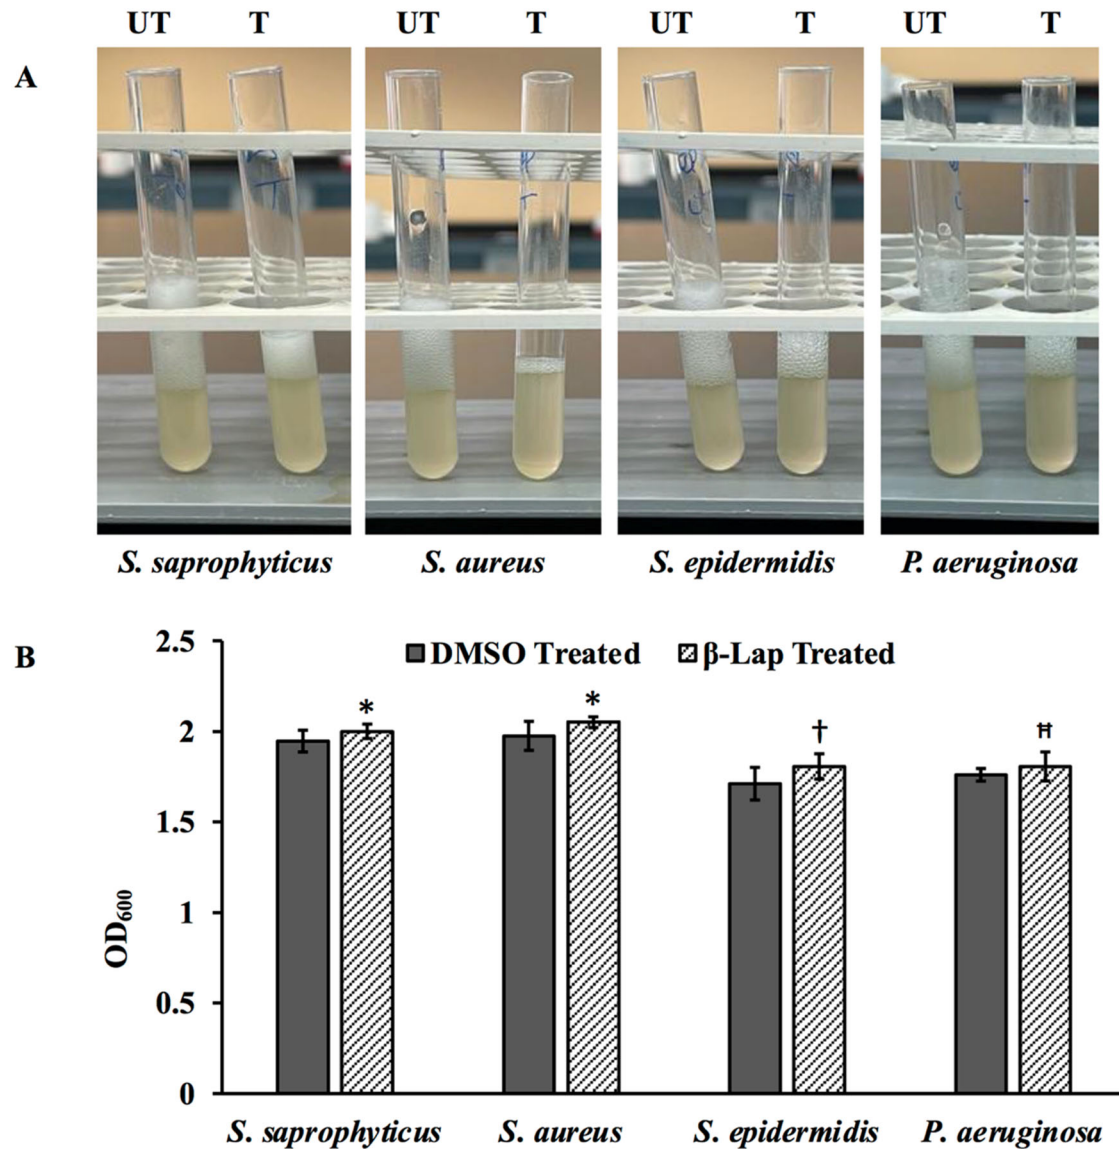

**Supplementary Figure S3. Catalase inhibition:** A) Out of two equal volume cultures for each strain, one was treated with DMSO and the other with 1/100xMIC of the  $\beta$ -Lap overnight. 200  $\mu$ L of 3% H<sub>2</sub>O<sub>2</sub> were added to 1m each of DMSO-treated and b-lap-treated cultures of each strain in glass tubes. The tubes were photographed after the air bubbles were formed. B) Before the addition of H<sub>2</sub>O<sub>2</sub>, the turbidity of cultures was measured by taking absorbance at 600 nm. UT: DMSO treated, T:  $\beta$ -Lap treated. \*,  $p < 0.002$ , †,  $p < 0.004$ , ‡,  $p < 0.007$ .
